# Supplementary material for: Restraint and Social Isolation Stressors Differentially Regulate Adaptive Immunity and Tumor Angiogenesis in a Breast Cancer Mouse Model
Source: PubMed Central journal article supplement (PMC5464739; doi:10.5539/cco.v6n1p12), 2016-11-11
Supplement: NIHMS833342-supplement-01.pdf [file NIHMS833342-supplement-01.pdf]

**Supplementary Figure 1**

Tumor weights in mice with 4T1 mammary tumors

| Tumor weights | NS   | aRRS       | cRRS | SI      |
|---------------|------|------------|------|---------|
| 1             | 1.75 | 0.11       | 1.03 | no data |
| 2             | 1.49 | 0.11       | 2.18 | 0.42    |
| 3             | 0.94 | 0.14       | 2.36 | 0.45    |
| 4             | 1.32 | 0.32       | 1.28 | 0.13    |
| 5             | 1.33 | 2.1        | 0.69 | 0.19    |
| 6             | 1.32 | 0.14       | 0.96 | 0.11    |
| 7             | 0.19 | <b>2.1</b> | 1.39 | 0.57    |
| 8             | 1.9  | 1.9        | 0.17 | 0.33    |
| 9             | 1.87 | 2.57       | 0.26 | 1.18    |
| 10            | 0.13 | 0.11       | 1.39 | 1.71    |

**Supplementary Figure 2**

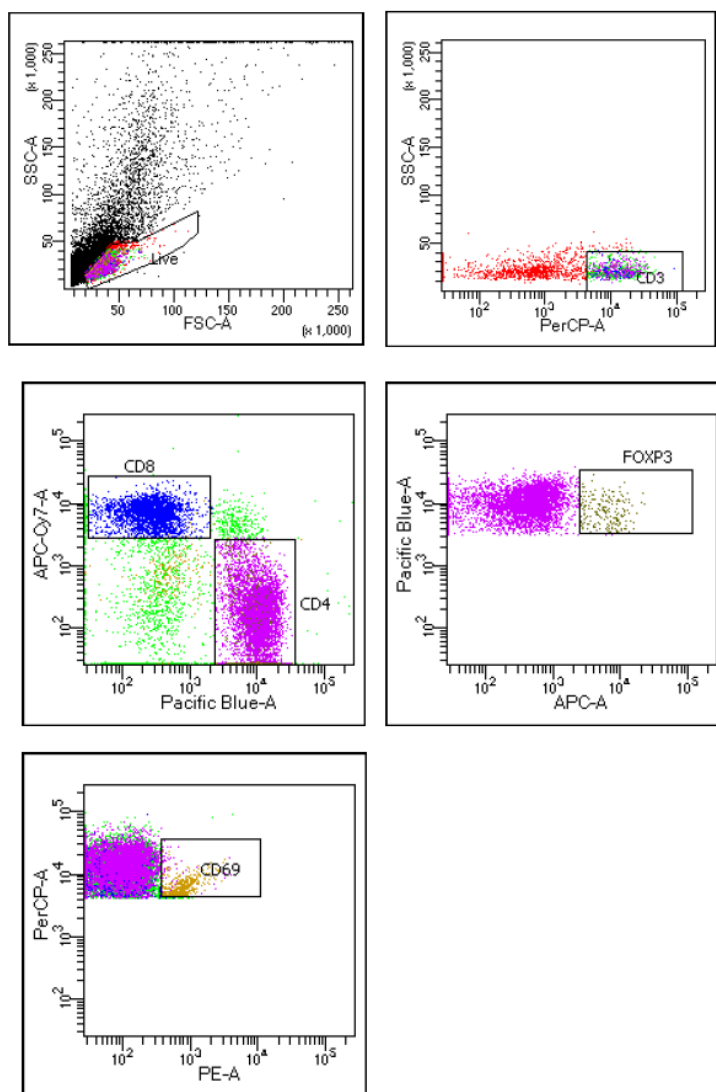

Figure 1. Representative dot plots from a NS mouse

**Copyrights**

Copyright for this article is retained by the author(s), with first publication rights granted to the journal.

This is an open-access article distributed under the terms and conditions of the Creative Commons Attribution license (<http://creativecommons.org/licenses/by/4.0/>).
